# Supplementary material for: Effect of Crisis Response Planning on Patient Mood and Clinician Decision Making: A Clinical Trial With Suicidal U.S. Soldiers
Source: Atypon-hosted journal article supplement (doi:10.1176/appi.ps.201700157), 2017-10-02
Supplement: appi.ps.201700157.ds001.pdf [file appi.ps.201700157.ds001.pdf]

## Means, standard deviations, and intercorrelations of visual mood analog scales and clinical scales at baseline

|                      | 1.      | 2.      | 3.     | 4.      | 5.     | 6.     | 7.     | 8.      | 9.     | 10.    | 11.    | 12.    | 13.    | 14.   |
|----------------------|---------|---------|--------|---------|--------|--------|--------|---------|--------|--------|--------|--------|--------|-------|
| 1. Depressed         | --      |         |        |         |        |        |        |         |        |        |        |        |        |       |
| 2. Calm              | -0.45** | --      |        |         |        |        |        |         |        |        |        |        |        |       |
| 3. Agitated          | 0.51**  | -0.53** | --     |         |        |        |        |         |        |        |        |        |        |       |
| 4. Hopeful           | -0.40** | 0.37**  | -0.24* | --      |        |        |        |         |        |        |        |        |        |       |
| 5. Urge to kill self | 0.31**  | -0.02   | 0.14   | -0.24*  | --     |        |        |         |        |        |        |        |        |       |
| 6. Anxious           | 0.43**  | -0.50** | 0.51** | -0.12   | 0.12   | --     |        |         |        |        |        |        |        |       |
| 7. Ashamed           | 0.30**  | -0.31** | 0.26** | -0.08   | 0.11   | 0.32** | --     |         |        |        |        |        |        |       |
| 8. Happy             | -0.35** | 0.23*   | -0.20  | 0.68**  | -0.22* | -0.07  | -0.11  | --      |        |        |        |        |        |       |
| 9. Tired             | 0.33**  | -0.29** | 0.16   | -0.17   | -0.02  | 0.13   | 0.09   | 0.01    | --     |        |        |        |        |       |
| 10. Burden           | 0.37**  | -0.44** | 0.44** | -0.17   | 0.09   | 0.40** | 0.62** | -0.19   | 0.19   | --     |        |        |        |       |
| 11. SSI              | 0.20    | -0.04   | 0.14   | -0.39** | 0.54** | 0.09   | -0.07  | -0.42** | -0.07  | 0.02   | --     |        |        |       |
| 12. BDI-II           | 0.46**  | -0.43** | 0.50** | -0.41** | 0.31** | 0.39** | 0.36** | -0.22*  | 0.29** | 0.49** | 0.23*  | --     |        |       |
| 13. PCL              | 0.35**  | -0.34** | 0.52** | -0.21*  | 0.17   | 0.48** | 0.16   | -0.06   | 0.22*  | 0.39** | 0.13   | 0.62** | --     |       |
| 14. BHS              | 0.32**  | -0.37** | 0.29** | -0.62** | 0.25** | 0.30** | 0.29** | -0.53** | 0.10   | 0.48** | 0.43** | 0.62** | 0.29   | --    |
| Mean                 | 71.7    | 34.4    | 52.6   | 22.9    | 23.6   | 57.0   | 42.6   | 18.6    | 74.7   | 52.8   | 15.2   | 33.2   | 50.2   | 12.8  |
| (SD)                 | (27.1)  | (30.1)  | (33.8) | (23.2)  | (27.5) | (34.3) | (36.1) | (22.4)  | (27.4) | (35.8) | (6.9)  | (11.2) | (18.4) | (5.4) |

\*  $p < .05$ , \*\*  $p < .01$ . BSSI-C=Beck Scale for Suicide Ideation; BDI-II=Beck Depression Inventory, Second Edition; PCL=PTSD Checklist, Stressor Version; BHS=Beck Hopelessness Scale.

Results of mixed effects models testing differences in slopes across treatments, by planned contrast

| VMAS Scale          | Omnibus:                  |        |       | Contrast 1:         |       |       | Contrast 2:         |       |       |
|---------------------|---------------------------|--------|-------|---------------------|-------|-------|---------------------|-------|-------|
|                     | E-CRP vs. S-SCRIP vs. CFS |        |       | E-CRP/S-CRP vs. CFS |       |       | E-CRP vs. S-CRP/CFS |       |       |
|                     | F                         | df     | p     | F                   | df    | p     | F                   | df    | p     |
| Depressed           | 12.2                      | 2, 182 | <.001 | 9.6                 | 1,184 | <.001 | 0.0                 | 1,184 | .999  |
| Calm                | 3.4                       | 2, 182 | .036  | 1.9                 | 1,184 | .002  | 6.8                 | 1,184 | .010  |
| Agitated/on edge    | 23.3                      | 2, 182 | <.001 | 45.2                | 1,184 | <.001 | 6.6                 | 1,184 | .011  |
| Hopeful             | 4.5                       | 2, 182 | .012  | 0.5                 | 1,184 | .480  | 8.6                 | 1,184 | <.001 |
| Urge to kill myself | 18.6                      | 2, 182 | <.001 | 35.9                | 1,184 | <.001 | 16.5                | 1,184 | <.001 |
| Anxious             | 1.8                       | 2, 182 | .168  | 0.7                 | 1,184 | .404  | 0.7                 | 1,184 | .404  |
| Ashamed             | 4.3                       | 2, 182 | .015  | 8.4                 | 1,184 | <.001 | 3.3                 | 1,184 | .071  |
| Happy               | 0.3                       | 2, 182 | .741  | 0.5                 | 1,184 | .480  | 0.4                 | 1,184 | .528  |
| Tired               | 7.6                       | 2, 182 | <.001 | 12.3                | 1,184 | <.001 | 0.0                 | 1,184 | .999  |
| Like a burden       | 12.7                      | 2, 182 | <.001 | 10.1                | 1,184 | <.001 | 24.5                | 1,184 | <.001 |

VMAS = Visual Mood Analog Scale, E-CRP =Enhanced Crisis Response Plan, S-CRP=Standard Crisis Response Plan, CFS=Contract for Safety

Within-group effect sizes (Cohen's d) for pre- to post-intervention change in emotional states

|                     | CFS  | S-CRP | E-CRP |
|---------------------|------|-------|-------|
| Depressed           | -0.2 | -0.6  | -0.4  |
| Calm                | 0.1  | 0.2   | 0.3   |
| Agitated/on edge    | 0.0  | -0.6  | -0.4  |
| Hopeful             | 0.3  | 0.3   | 0.5   |
| Urge to kill myself | 0.1  | -0.3  | -0.2  |
| Anxious             | -0.2 | -0.2  | -0.3  |
| Ashamed             | -0.2 | -0.3  | -0.2  |
| Happy               | 0.2  | 0.3   | 0.3   |
| Tired               | 0.0  | -0.3  | -0.1  |
| Like a burden       | -0.3 | -0.4  | -0.5  |
